# Supplementary material for: Speeding Up Social Waves. Propagation Mechanisms of Shimmering in Giant Honeybees
Source: PLoS One. 2014 Jan 27;9(1):e86315. doi: 10.1371/journal.pone.0086315 (PMC3903527; doi:10.1371/journal.pone.0086315)
Supplement: Table S1 — Accessory table to the Fig. 7 B–C, Fig. 8 A–C and Fig. 10 B with details of the regression functions regarding individual bees on the surface of the experimental giant honeybee nest B identified as status I–III agents (for definition, see text); tw, time window in [ff] at fps = 60 Hz; alldir, all four main directions of the spreading of the shimmering waves as selected in the paper: , , , ; with R,L,T,B as right, left, top, bottom; abscissa and ordinate, the parameters used in the respective Figures/panels; coefficients of regressions (polynomials, exponential functions) are not detailed here; number of cases gives the number of focus bees or neighbour bees as evaluated in the data sets; goodness of fit (R2) regards the regression functions of mean values. (DOCX) [file pone.0086315.s008.docx]

Table S1.

| ***Line*** | ***Figure Panel***  ***Symbol*** | ***Agent***  ***type /*** *Status* | ***Wave dir*** | ***Abscissa*** | ***Ordinate*** | ***Number of cases*** | ***Goodness***  ***R2*** |
| --- | --- | --- | --- | --- | --- | --- | --- |
|  | Fig 7 | ***Agents*** |  |  |  |  |  |
| 1 | A1 | *Focus bees* |  |  |  | 13 678 |  |
| 2 | A2 | *Focus bees* |  |  |  | 4 025 |  |
| 3 | A3 | *Neighbour bees* |  |  |  | 29 248 |  |
|  | Fig 7 | ***Focus bees*** |  |  |  |  |  |
| 4 | B1 | *bucket bridging* |  | tw [ff] |  | 2 759 (ff=10) | 0.9717 |
| 5 | B2 | *chain-tail* |  | tw [ff] |  | 353 (ff=10) | 0.9884 |
| 6 | B3 | *generator* |  | tw [ff] |  | 538 (ff=10) | 0.9878 |
|  | Fig 7 | ***Neighbour bees*** |  |  |  |  |  |
| 7 | C1 | *bucket bridging* |  | tw [-ff] |  | 16 809 (ff=-10) | 0.9913 |
| 8 | C2 | *bucket bridging* |  | tw [+ff] |  | 19 333(ff=+10) | 0.9914 |
| 9 | C3 | *chain-tail* |  | tw [-ff] |  | 2 056 (ff=-10) | 0.9995 |
| 10 | C4 | *generator* |  | tw [+ff] |  | 2 679 (ff=+10) | 0.9983 |
|  | Fig. 8 A | ***Neighbour bees*** |  |  |  |  |  |
| 11 | black | *bucket bridging* |  |  |  | 3 472 | 0.9893 |
| 12 | red | *bucket bridging* |  |  |  | 1 035 | 0.9933 |
|  | Fig. 8 B | ***Neighbour bees*** |  |  |  |  |  |
| 13 | black | *chain-tail* |  | < 6 |  |  | 0.9529 |
| 14 | black | *chain_tail* |  | > 5 |  |  | 0.9902 |
| 15 | red | *chain_tail* |  | < 6 |  |  | 0.6647 |
| 16 | red | *chain_tail* |  | > 5 |  |  | 0.9312 |
|  | Fig. 8 C | ***Neighbour bees*** |  |  |  |  |  |
| 17 | black | *generator* |  | < 5 |  |  | 0.9984 |
| 18 | black | *generator* |  | > 4 |  |  | 0.9952 |
| 19 | red | *generator* |  | < 5 |  |  | 0.9999 |
| 20 | red | *generator* |  | > 4 |  |  | 0,9586 |
|  | Fig. 10 | ***Focus bees*** |  |  |  |  |  |
| 21 | B |  |  |  |  | 13 678 | 0.9991 |

Accessory table to the Fig.7 B-C, Fig.8 A-C and Fig.10 B with details of the regression functions regarding individual bees on the surface of the experimental giant honeybee nest B identified as *status I-III* agents (for definition, see text); tw, time window in [ff] at fps = 60 Hz; , all four main directions of the spreading of the shimmering waves as selected in the paper: , , , ; with *R*, *L*, *T*, *B* as *right, left, top, bottom*; abscissa and ordinate, the parameters used in the respective Figures/panels; coefficients of regressions (polynomials, exponential functions) are not detailed here; *number of cases* gives the number of *focus* bees or *neighbour* bees as evaluated in the data sets; *goodness of fit* (R2) regards the regression functions of mean values.
