# Supplementary material for: Speeding Up Social Waves. Propagation Mechanisms of Shimmering in Giant Honeybees
Source: PLoS One. 2014 Jan 27;9(1):e86315. doi: 10.1371/journal.pone.0086315 (PMC3903527; doi:10.1371/journal.pone.0086315)
Supplement: Table S2 — Survey of the data associated to Figs. 7,10 concerning agents of the bucket-bridging (Status I) type; experimental nest B (see Methods); a,b, significant differences (<0.01, χ2 test) within groups. The hypothetical distributions are normalized denotations of PEAK and SINK distribution patterns (see Results). (DOCX) [file pone.0086315.s009.docx]

Table S2.

|  |  | | ***Status I / Bucket-bridging*** / **agents** | | | | | | | | | | | |
| --- | --- | --- | --- | --- | --- | --- | --- | --- | --- | --- | --- | --- | --- | --- |
| **Line** | **Figure**  **Panel** | **Reference** | | **Equation** | **Template** | | | **Phase** | | | | | | **Impact [%]** |
|  |  | ***Shimmering-active neighbours***  ***[%]*** | | | |  | | |  | | |  | | |  | | | |
| 1 | 7 A3 |  | |  |  | | | *pre-stroke* | | | | | | 47.16 |
| 2 | 7 A3 |  | |  |  | | | *post-stroke* | | | | | | 41.01 |
|  |  | ***Deviation of***  ***from hypothetical distributions [%]:*** ***,*** | | | | | | | | |  | | | |  | | |  | | | | |  | | |
| 3 | 10 C1-2 |  | | 3a | *PEAK* | | | *pre-stroke* | | | | | | 5.39a |
| 4 | 10 C1-2 |  | | 3b | *SINK* | | | *pre-stroke* | | | | | | 19.28a |
| 5 | 10 D1-2 |  | | 3a | *PEAK* | | | *post-stroke* | | | | | | 19.20b |
| 6 | 10 D1-2 |  | | 3b | *SINK* | | | *post-stroke* | | | | | | 4.57b |
|  |  | **/ *Angular variance of***  ***[%]*** | | | | |  | | |  | | |  | |  | | | | |
| 7 | 10 C1-2 | = [0°] - [180°] | |  | *PEAK* | | | *pre-stroke* | | | | | | 36.97 |
| 8 | 10 D1-2 | = [180°] - [0°] | |  | *SINK* | | | *post-stroke* | | | | | | 40.73 |
|  |  | ***Probability by which***  ***matched with the hypothetical distributions [%]:*** | | | | | | | | | | | | |  | |  | | | | |  | | |  | | |
| 9 | 10 C1-2 |  | |  | *PEAK* | | | *pre-stroke* | | | | | | 94.61 |
| 10 | 10 D1-2 |  | |  | *SINK* | | | *post-stroke* | | | | | | 95.43 |
|  |  | ***Contribution in wave direction control [%]:*** | | | | | | | | | | | | |  |  | | | | |  | | |  | | |
| 11 | 10 C1-2 |  | |  | *PEAK* | | | *pre-stroke* | | | | | | 16.50 |
| 12 | 10 D1-2 |  | |  | *SINK* | | | *post-stroke* | | | | | | 15.94 |
|  |  |  | |  |  | | |  | | | | | |  |

Survey of the data associated to Figs. 7,10 concerning agents of the *bucket-bridging* (*Status I*) type; experimental nest B (see Methods); a,b, significant differences (P < 0.01, χ2 test) within groups. The *hypothetical distributions* are normalized denotations of *PEAK* and *SINK* distribution patterns (see Results).
