# Supplementary material for: Speeding Up Social Waves. Propagation Mechanisms of Shimmering in Giant Honeybees
Source: PLoS One. 2014 Jan 27;9(1):e86315. doi: 10.1371/journal.pone.0086315 (PMC3903527; doi:10.1371/journal.pone.0086315)
Supplement: Table S3 — Survey of the data associated to Figs. 7,10 concerning agents of the chain-tail (Status II) type; experimental nest B (see Methods); a significant differences ( = 0.0459, χ2 test) within groups; na, not available data; the hypothetical distributions are normalized denotations of PEAK and SINK distribution patterns (see Results). (DOCX) [file pone.0086315.s010.docx]

Table S3.

|  |  | | **Status II / Chain-tail / agents** | | | | | | | | | | | |
| --- | --- | --- | --- | --- | --- | --- | --- | --- | --- | --- | --- | --- | --- | --- |
| **Line** | **Figure**  **Panel** | **Reference** | | **Equation** | **Template** | | | **Phase** | | | | | | **Impact [%]** |
|  |  | ***Shimmering-active neighbours***  ***[%]*** | | | |  | | |  | | |  | | | |  | | | | |
| 1 | 7 A3 |  | |  |  | | | *pre-stroke* | | | | | | 5.08 |
| 2 | na |  | |  |  | | | *post-stroke* | | | | | | na |
|  |  | ***Deviation of***  ***from hypothetical distributions [%]:*** ***,*** | | | | | | | | |  | | | | |  | | | |  | | | | |  | | |
| 3 | 10 E1-2 |  | | 3a | *PEAK* | | | *pre-stroke* | | | | | | 9.23a |
| 4 | 10 E1-2 |  | | 3b | *SINK* | | | *pre-stroke* | | | | | | 20.04a |
| 5 | na |  | | 3a | *PEAK* | | | *post-stroke* | | | | | | na |
| 6 | na |  | | 3b | *SINK* | | | *post-stroke* | | | | | | na |
|  |  | **/ *Angular variance of***  ***[%]*** | | | | |  | | |  | | |  | | | |  | | | | |
| 7 | 10 E1-2 | = [0°] - [180°] | |  | *PEAK* | | | *pre-stroke* | | | | | | 47.81 | |
| 8 | na | = [180°] - [0°] | |  | *SINK* | | | *post-stroke* | | | | | | na | |
|  |  | ***Probability by which***  ***matched with the hypothetical distributions [%]:*** | | | | | | | | | | | | | |  | | |  | | | | |  | | |  | | |
| 9 | 10 E1-2 |  | |  | *PEAK* | | | *pre-stroke* | | | | | | 90.77 |
| 10 | na |  | |  | *SINK* | | | *post-stroke* | | | | | | na |
|  |  | ***Contribution in wave direction control [%]:*** | | | | | | | | | | | | | |  | |  | | | | |  | | |  | | |
| 11 | 10 E1-2 |  | |  | *PEAK* | | | *pre-stroke* | | | | | | -2.20 |
| 12 | na |  | |  | na | | | *post-stroke* | | | | | | na |
|  |  |  | |  |  | | |  | | | | | |  |

Survey of the data associated to Figs.7,10 concerning agents of the *chain-tail* (*Status II*) type; experimental nest B (see Methods); a significant differences (P**DEV** = 0.0459, χ2 test) within groups; na, not available data; the *hypothetical distributions* are normalized denotations of *PEAK* and *SINK* distribution patterns (see Results).
